# Supplementary material for: Determination of Phthalate Esters in Beverages and Water Samples by Solid Phase Extraction with Resin Based COFs as Filler
Source: MDPI journal article supplement (doi:10.3390/w13233338), 2021-11-24
Supplement: s1 [file s1]

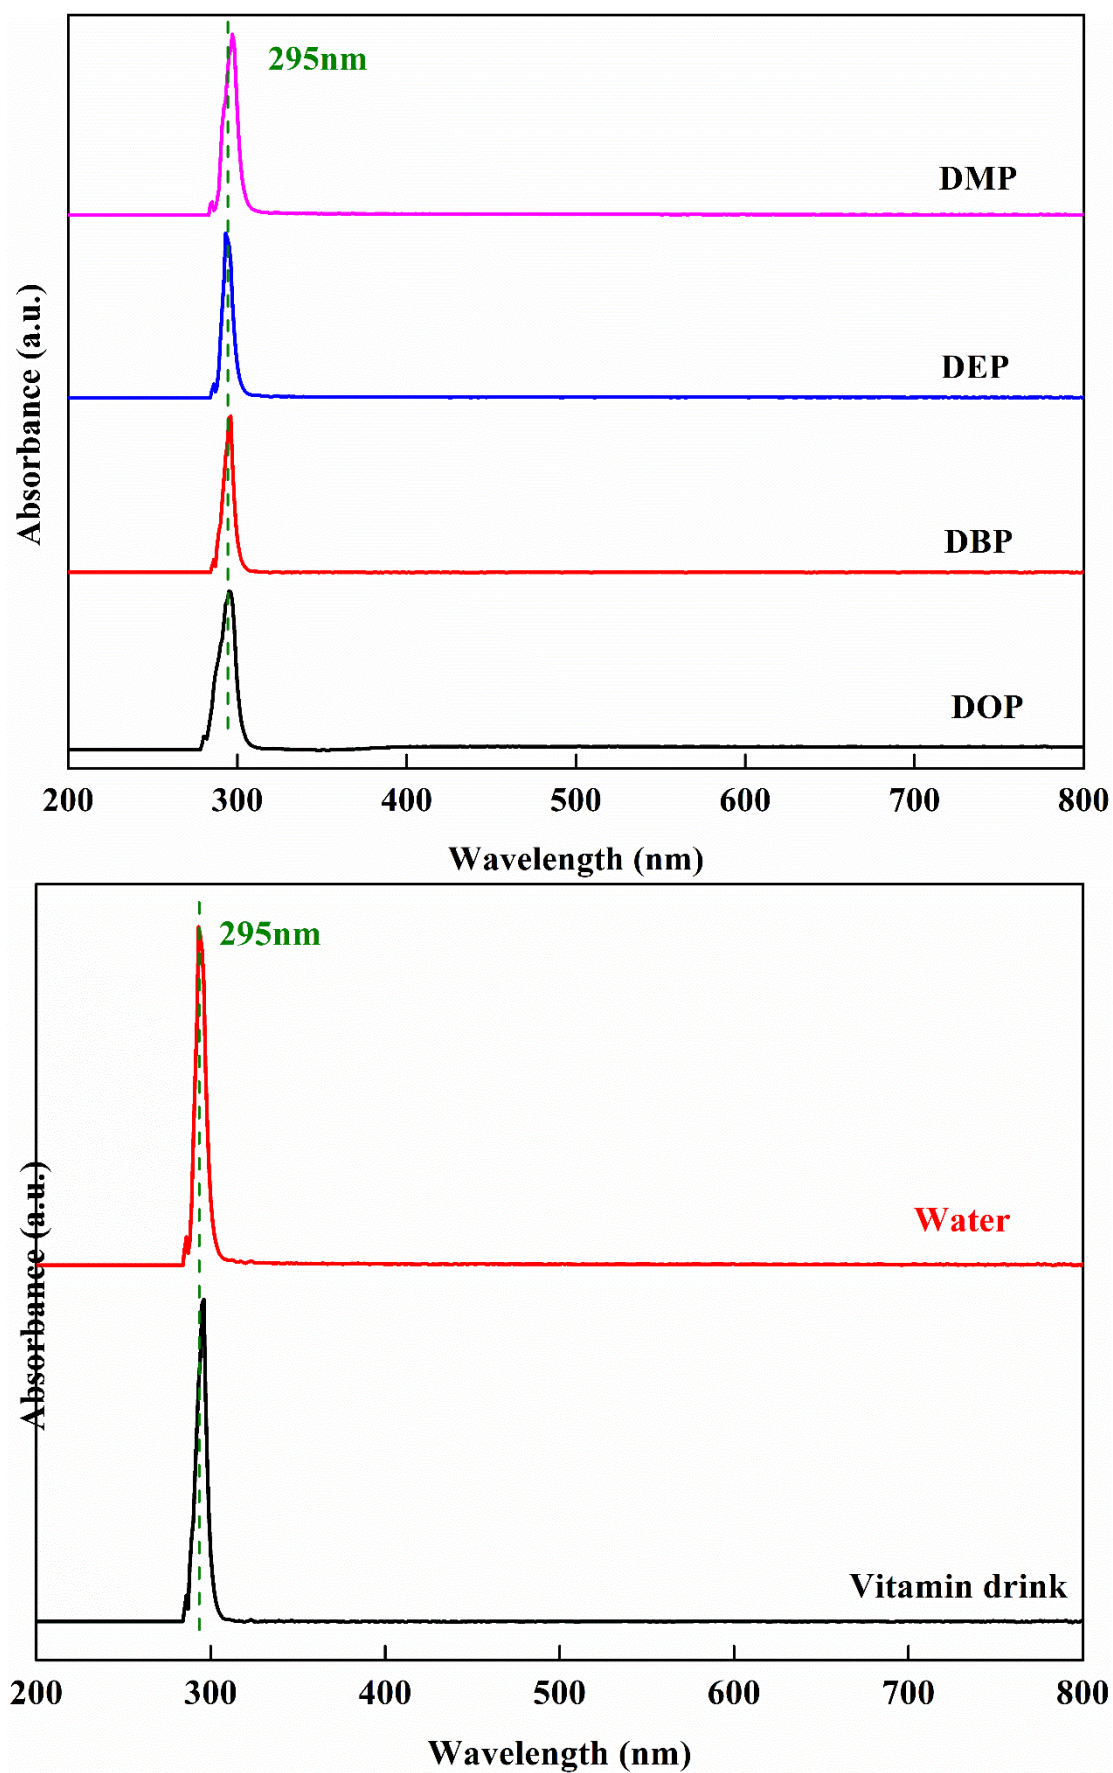

Figure S1. UV spectrum of phthalate and its spiked solution.

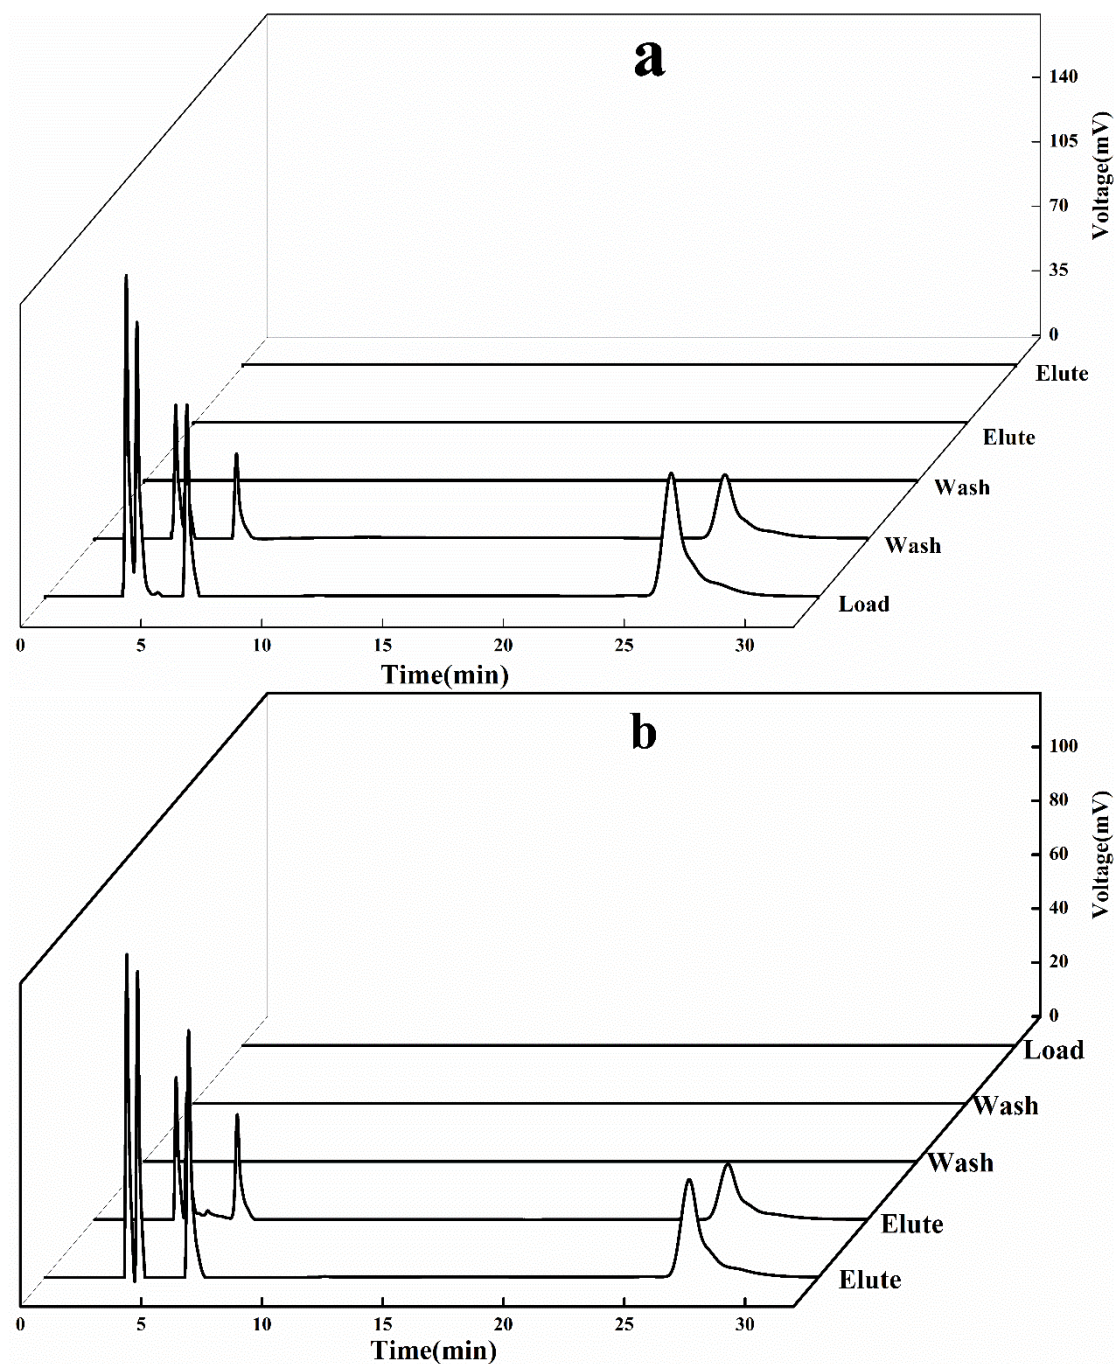

Figure S2. X-C solid phase extraction scheme without acid and alkali.

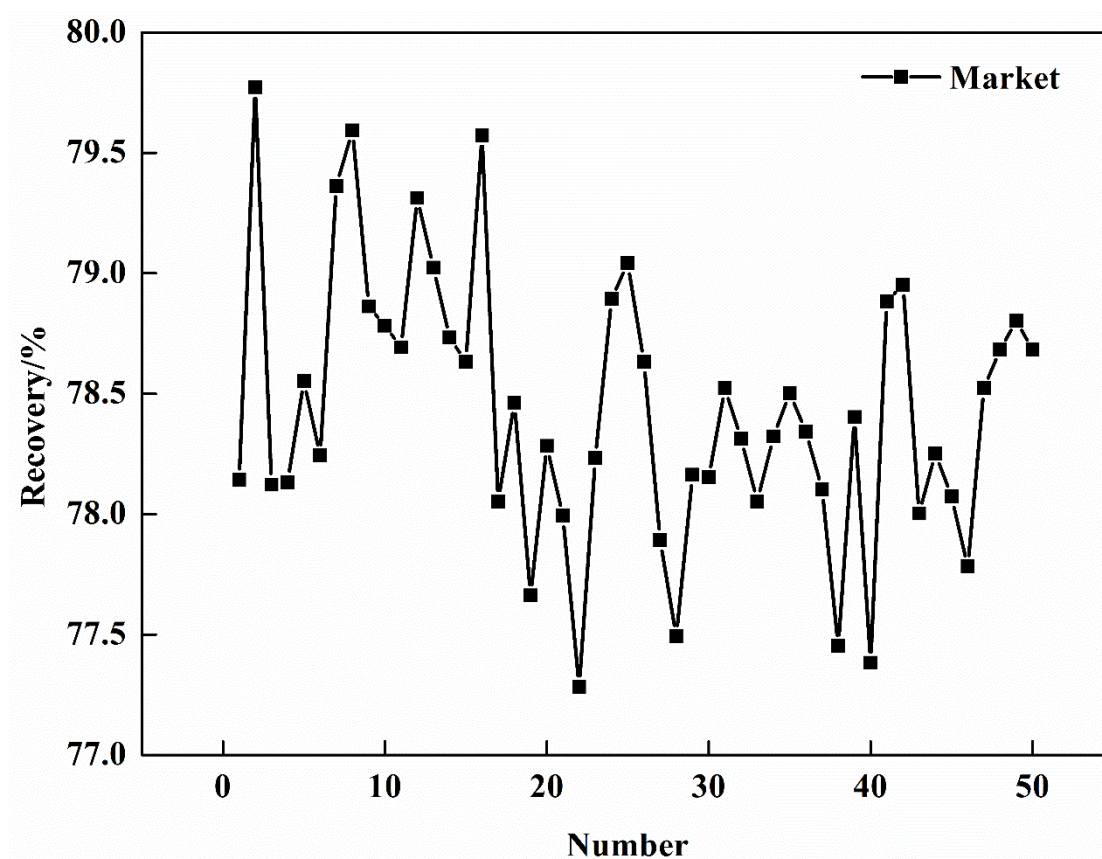

**Figure S3.** reusability of commercial solid phase extraction column.
