# Supplementary material for: Determination of Phthalate Esters in Beverages and Water Samples by Solid Phase Extraction with Resin Based COFs as Filler
Source: MDPI journal article supplement (doi:10.3390/w13233338), 2021-11-24
Supplement: s1 [file s1]

Archive with 1 entries (1 files):
- water-1455402-supplementary.pdf
